# Supplementary material for: Role of Dietary Habits in the Prevention of Diverticular Disease Complications: A Systematic Review
Source: MDPI journal article supplement (doi:10.3390/nu13041288), 2021-04-14
Supplement: s1 [file s1]

**Supplementary Table S1. Quality assessment according to Newcastle Quality Assessment Scale**

| <b>Newcastle Quality Assessment Scale- COHORT STUDIES</b>          |                                          |                                     |                           |                                                                          |                                                                                                                                     |                            |                                                 |                                  |         |
|--------------------------------------------------------------------|------------------------------------------|-------------------------------------|---------------------------|--------------------------------------------------------------------------|-------------------------------------------------------------------------------------------------------------------------------------|----------------------------|-------------------------------------------------|----------------------------------|---------|
|                                                                    | Selection                                |                                     |                           |                                                                          | Comparability                                                                                                                       | Outcome                    |                                                 |                                  |         |
| Study                                                              | Representativeness of the exposed cohort | Selection of the non exposed cohort | Ascertainment of exposure | Demonstration that outcome of interest was not present at start of study | Comparability of cohorts on the basis of the design or analysis                                                                     | Assessment of outcome      | Was follow-up long enough for outcomes to occur | Adequacy of follow up of cohorts | Total * |
| Ma W, 2019                                                         | 0                                        | 1                                   | 0                         | 1                                                                        | 2                                                                                                                                   | 0                          | 1                                               | 1                                | 6       |
| Cao Y, 2018                                                        | 0                                        | 1                                   | 0                         | 1                                                                        | 2                                                                                                                                   | 0                          | 1                                               | 1                                | 6       |
| Strate LL, 2017                                                    | 0                                        | 1                                   | 0                         | 1                                                                        | 2                                                                                                                                   | 0                          | 1                                               | 1                                | 6       |
| Crowe FL, 2014                                                     | 0                                        | 1                                   | 0                         | 1                                                                        | 2                                                                                                                                   | 1                          | 1                                               | Unclear                          | 6       |
| Strate LL, 2008                                                    | 0                                        | 1                                   | 0                         | 1                                                                        | 2                                                                                                                                   | 0                          | 1                                               | 1                                | 6       |
| Kim YC, 2019                                                       | 1                                        | 1                                   | Unclear                   | 1                                                                        | 1                                                                                                                                   | Unclear                    | 1                                               | Unclear                          | 5       |
| <b>Newcastle Quality Assessment Scale- CROSS-SECTIONAL STUDIES</b> |                                          |                                     |                           |                                                                          |                                                                                                                                     |                            |                                                 |                                  |         |
| Study                                                              | Selection                                |                                     |                           |                                                                          | Comparability                                                                                                                       | Outcome                    |                                                 |                                  |         |
|                                                                    | Representativeness of the sample         | Sample size                         | Non-respondents           | Ascertainment of the exposure                                            | The subjects in different outcome groups are comparable, based on the study design or analysis. Confounding factors are controlled. | Assessment of the outcome: | Statistical test                                | Total **                         |         |
| Nagata N, 2014                                                     | 1                                        | 0                                   | Unclear                   | 1                                                                        | 1                                                                                                                                   | 2                          | 1                                               | 6                                |         |
| Papagrigoriadis S, 1999                                            | 0                                        | 0                                   | Unclear                   | 1                                                                        | 1                                                                                                                                   | 1                          | 1                                               | 4                                |         |

Legend of the table:

1= Adequate; 0= Inadequate; Unclear

\*the maximum is 9

\*\*the maximum is 10
